# Supplementary material for: Solvatofluorochromism of polyethyleneimine-encapsulated Ag nanoclusters and their concentration-dependent fluorescence
Source: Royal Society of Chemistry journal article supplement (doi:10.1039/c3tc30168k), 2013-01-01
Supplement: c3tc30168k.pdf [file c3tc30168k.pdf]

# Supplementary Information

## **Solvatofluorochromism of polyethyleneimine-encapsulated Ag nanoclusters and their concentration-dependent fluorescence**

**Fei Qu, Li Li Dou, Nian Bing Li\* and Hong Qun Luo\***

Key Laboratory of Eco-environments in Three Gorges Reservoir Region (Ministry of Education), School of Chemistry and Chemical Engineering, Southwest University, Chongqing 400715, P. R. China.

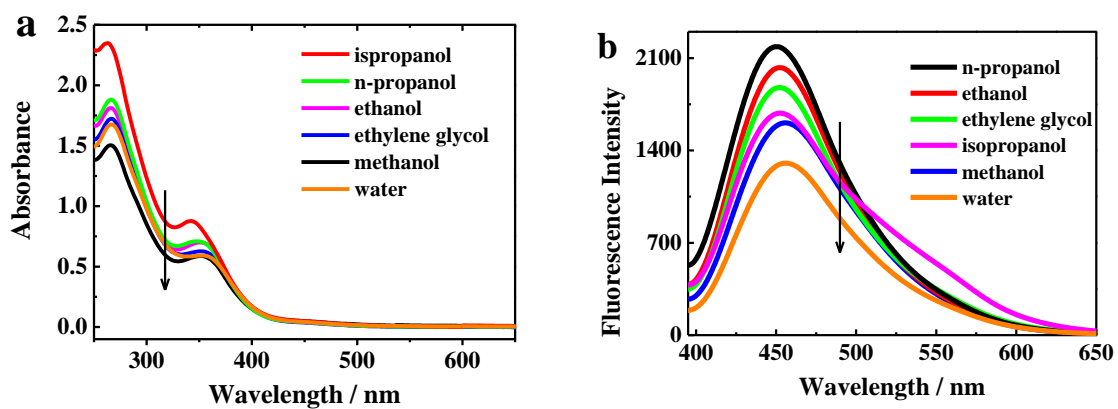

**Fig. S1** UV-vis (a) and fluorescence spectra (b) of PEI-capped Ag nanoclusters dispersed in water, methanol, ethanol, ethylene glycol, n-propanol, and isopropanol.

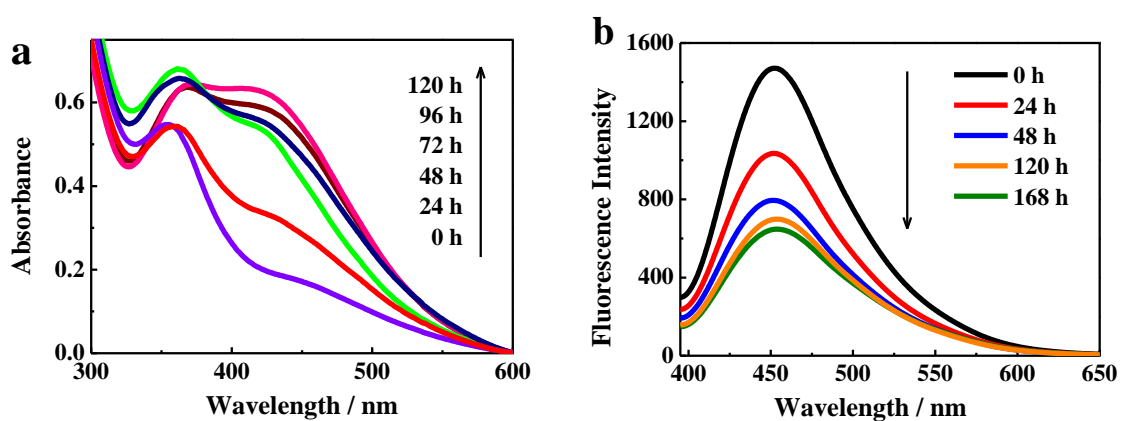

**Fig. S2** Time evolution of UV-vis (a) and fluorescence spectra (b) of PEI-capped Ag nanoclusters dispersed in DMSO.

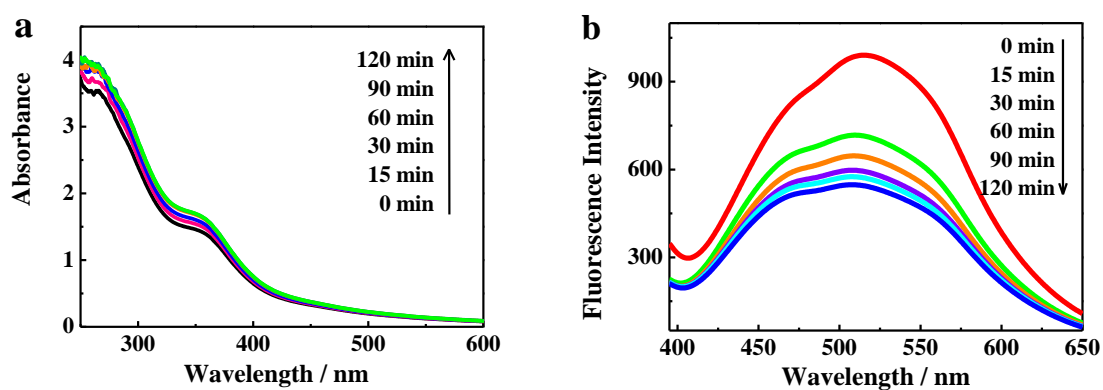

**Fig. S3** Time evolution of UV-vis (a) and fluorescence spectra (b) of PEI-capped Ag nanoclusters dispersed in THF.

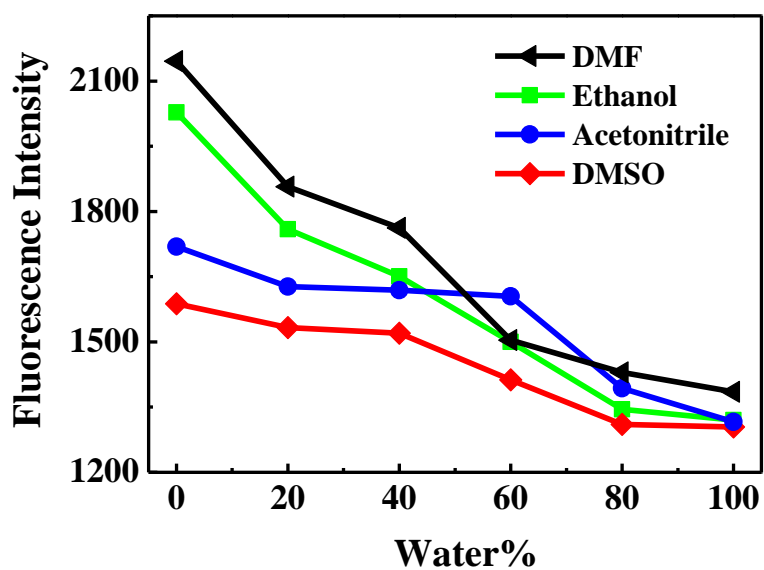

**Fig. S4** Comparison of the changes of fluorescence intensity of PEI-capped Ag nanoclusters dispersed in other water-organic mixtures at different ratios.

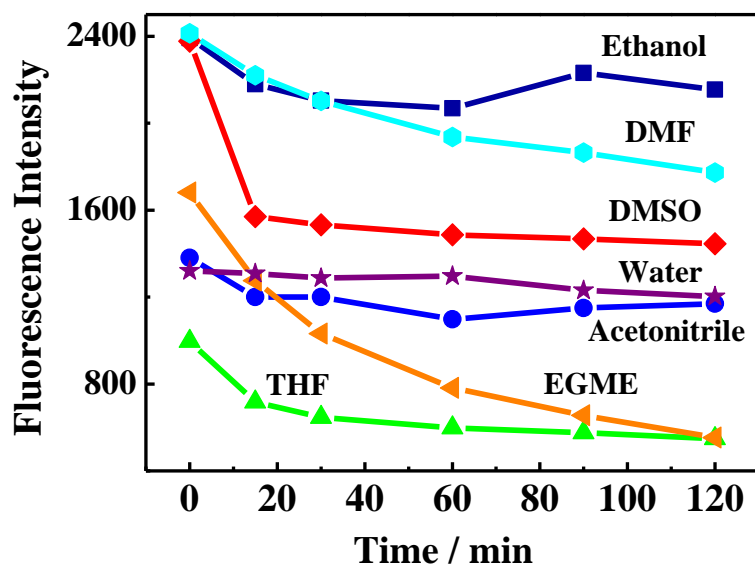

Fig. S5 Comparison the stability of PEI-capped Ag nanoclusters dispersed in different solvents.

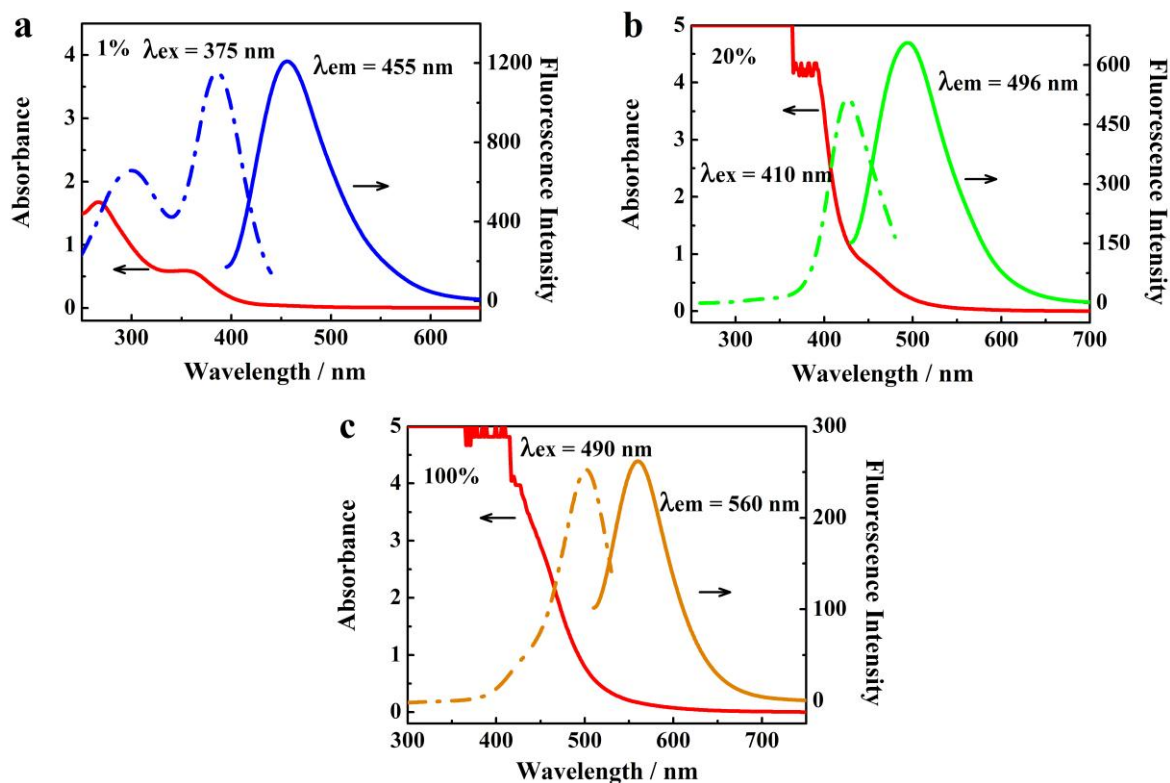

Fig. S6 Comparison of the absorption, excitation and emission spectra of different concentration of PEI-capped Ag nanoclusters (a, 1%; b, 20%; c, 100%).

**Table S1** Solubility and quantum yield (QY) of PEI-capped Ag nanoclusters (AgNCs) and solubility of pure PEI in different solvents and the corresponding solvent constants.

| Solvent         | Solubility of AgNCs | Solubility of PEI | $\epsilon$ | $n$   | QY (%) |
|-----------------|---------------------|-------------------|------------|-------|--------|
| water           | Good                | Good              | 78.5       | 1.333 | 2.5    |
| methanol        | Good                | Good              | 32.7       | 1.329 | 3.2    |
| ethanol         | Good                | Good              | 24.5       | 1.362 | 3.8    |
| ethylene glycol | Good                | Fair              | 37.7       | 1.431 | 3.7    |
| n-propanol      | Good                | Fair              | 20.3       | 1.399 | 4.3    |
| isopropanol     | Good                | Fair              | 18.62      | 1.378 | 3.0    |
| acetonitrile    | Good                | Fair              | 37.5       | 1.344 | 3.3    |
| DMF             | Good                | Fair              | 36.7       | 1.428 | 4.2    |
| DMSO            | Good                | Fair              | 46.45      | 1.478 | 2.9    |
| THF             | Fair                | Insoluble         | 7.6        | 1.405 | 1.8    |
| EGME (15 min)   | Good                | Fair              | 16.9       | 1.402 | 2.4    |
| EGME (180 min)  | Good                | Fair              | –          | –     | 0.8    |

Note that  $\epsilon$  and  $n$  are the dielectric constant of the solvent and its refractive index, respectively (at 20 °C).
